# Supplementary material for: An Optimized HPLC-DAD Methodology for the Determination of Anthocyanins in Grape Skins of Red Greek Winegrape Cultivars (Vitis vinifera L.)
Source: MDPI journal article supplement (doi:10.3390/molecules27207107), 2022-10-21
Supplement: s1 [file s1]

## **Supplementary Material**

### **An Optimized HPLC-DAD Methodology for the Determination of Anthocyanins in Grape Skins of Red Greek winegrape Cultivars (*Vitis vinifera* L.)**

Natasa P. Kalogiouri, Christina Karadimou, Mary S. Avgidou, Elissavet Petsa, Emmanouil-Nikolaos Papadakis, Serafeim Theocharis, Ioannis Mourtzinou, Urania Menkissoglou-Spiroudi and Stefanos Koundouras

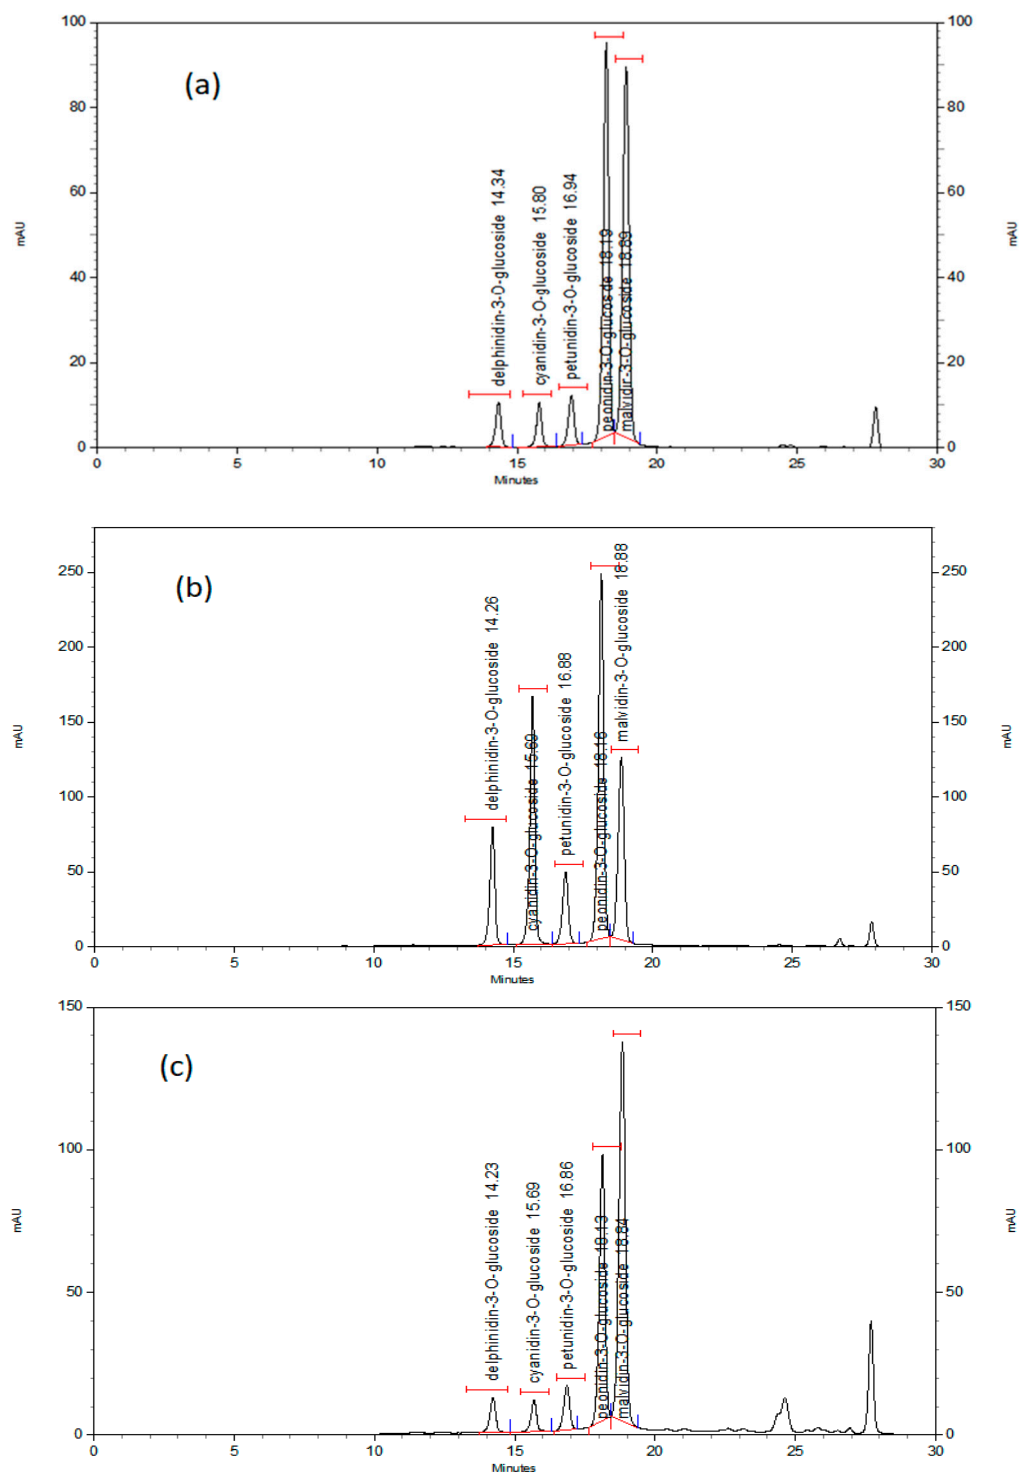

**Figure S1.** Characteristic chromatograms of real non-spiked samples, one of each variety: (a) Vradiano; (b) Kotsifali; (c) Limnio.

**Table S1.** Percentage of individual anthocyanin content in the skins of the red grape varieties 'Kotsifali', 'Limnio' and 'Vradiano'.

|           | <b>Dlp</b> | <b>Cyn</b> | <b>Pt</b> | <b>Pn</b> | <b>MLv</b> |
|-----------|------------|------------|-----------|-----------|------------|
| <b>A1</b> | 6.9        | 8.3        | 6.2       | 35.7      | 43.0       |
| <b>A2</b> | 11.1       | 15.4       | 7.7       | 35.3      | 30.4       |
| <b>A3</b> | 10.9       | 20.4       | 7.2       | 35.7      | 25.8       |
| <b>A4</b> | 9.1        | 17.5       | 6.8       | 34.4      | 32.2       |
| <b>A5</b> | 6.7        | 15.7       | 6.6       | 32.4      | 38.7       |
| <b>A6</b> | 7.9        | 7.7        | 7.0       | 36.5      | 40.9       |
| <b>B1</b> | 3.6        | 1.0        | 4.6       | 13.6      | 77.3       |
| <b>B2</b> | 2.6        | 1.4        | 3.2       | 24.3      | 68.5       |
| <b>B3</b> | 3.4        | 1.8        | 4.0       | 27.9      | 63.0       |
| <b>B4</b> | 3.7        | 1.8        | 4.2       | 22.2      | 68.1       |
| <b>B5</b> | 2.6        | 1.1        | 3.3       | 15.6      | 77.4       |
| <b>B6</b> | 4.0        | 3.7        | 4.6       | 29.7      | 58.0       |
| <b>B7</b> | 2.9        | 1.6        | 3.5       | 14.0      | 78.1       |
| <b>C1</b> | 4.5        | 3.8        | 4.6       | 37.3      | 49.9       |
| <b>C2</b> | 3.7        | 5.2        | 4.1       | 48.8      | 38.1       |
| <b>C3</b> | 5.6        | 4.3        | 5.8       | 39.5      | 44.9       |

Dlp: delphinidin-3-O-glucoside; Cyn: cyanidin-3-O-glucoside; Pt: petunidin-3-O-glucoside; Pn: peonidin-3-O-glucoside; MLv: malvidin-3-O-glucoside

**Table S2.** Classical analysis results of red grapes

| <b>Sample</b> | <b>Variety</b> | <b>Region</b> | <b>Brix</b> | <b>pH</b> | <b>Total Acidity<br/>(g/L tartaric<br/>acid)</b> | <b>weight of<br/>50 grapes<br/>(g)</b> |
|---------------|----------------|---------------|-------------|-----------|--------------------------------------------------|----------------------------------------|
| A1            | Kotsifali      | Heraklion     | 21.8        | 3.5       | 5.9                                              | 107.5                                  |
| A2            | Kotsifali      | Heraklion     | 23.9        | 3.4       | 6.8                                              | 98.6                                   |
| A3            | Kotsifali      | Heraklion     | 18.5        | 3.1       | 7.8                                              | 110.2                                  |
| A4            | Kotsifali      | Heraklion     | 23.1        | 3.2       | 6.5                                              | 98.5                                   |
| A5            | Kotsifali      | Athens        | 20.4        | 3.5       | 6.8                                              | 76.4                                   |
| A6            | Kotsifali      | Thessaloniki  | 26.0        | 3.7       | 6.5                                              | 102.6                                  |
| B1            | Limnio         | Athens        | 19.3        | 3.7       | 3.9                                              | 51.6                                   |
| B2            | Limnio         | Thessaloniki  | 22.4        | 3.4       | 5.6                                              | 135.0                                  |
| B3            | Limnio         | Halkidiki     | 22.3        | 3.7       | 4.4                                              | 91.4                                   |
| B4            | Limnio         | Halkidiki     | 21.0        | 3.4       | 5.3                                              | 76.8                                   |
| B5            | Limnio         | Xanthi        | 21.5        | 3.4       | 5.6                                              | 93.7                                   |
| B6            | Limnio         | Lemnos        | 21.7        | 3.8       | 4.2                                              | 58.8                                   |
| B7            | Limnio         | Serres        | 21.2        | 3.5       | 4.8                                              | 106.0                                  |
| C1            | Vradiano       | Athens        | 19.7        | 3.5       | 6.0                                              | 82.5                                   |
| C2            | Vradiano       | Euboea        | 22.9        | 3.4       | 4.8                                              | 123.8                                  |
| C3            | Vradiano       | Euboea        | 23.0        | 3.4       | 4.8                                              | 120.8                                  |
